# Supplementary material
Source: PubMed Central journal article supplement (PMC5801691)

# Supplementary Figure 1

**A**

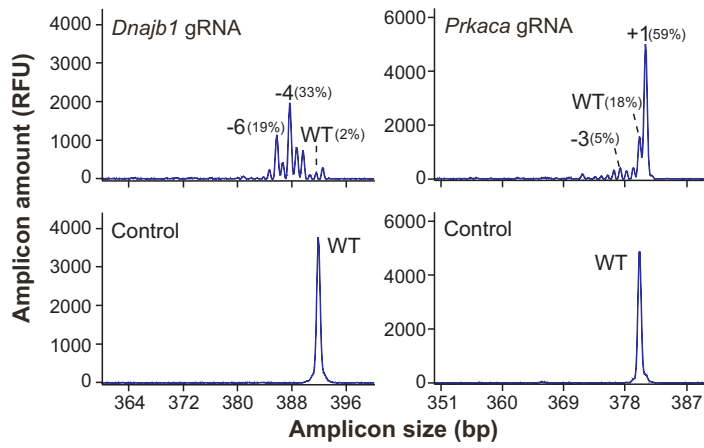

**B**

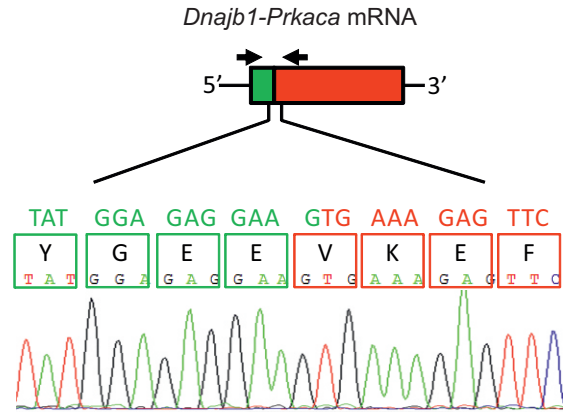

**C**

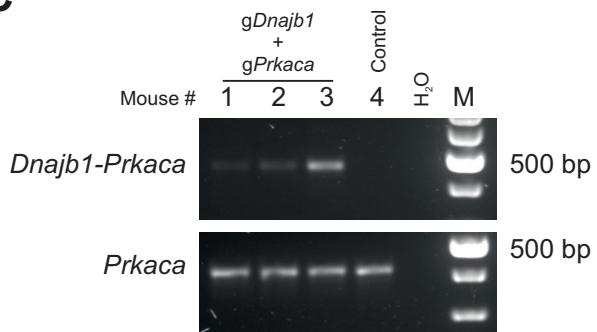

Supplement: NIHMS906621-supplement-2.pdf [file NIHMS906621-supplement-2.pdf]

# Supplementary Figure 2

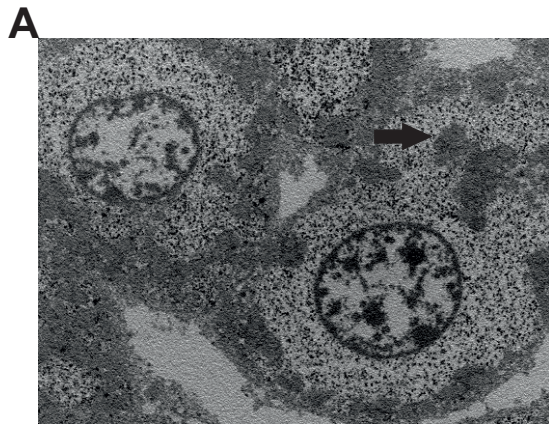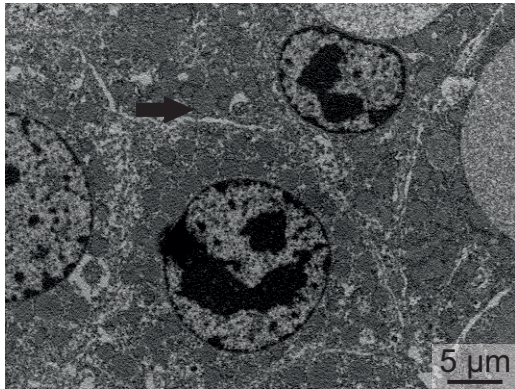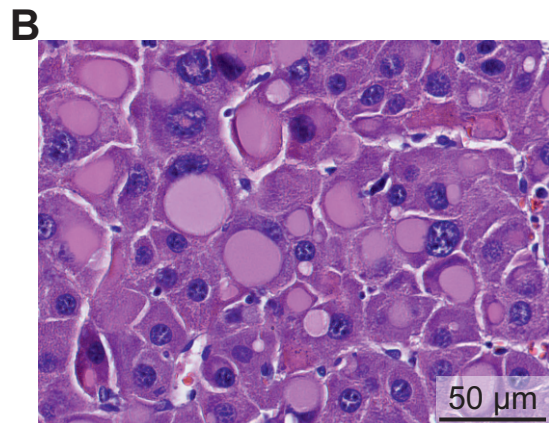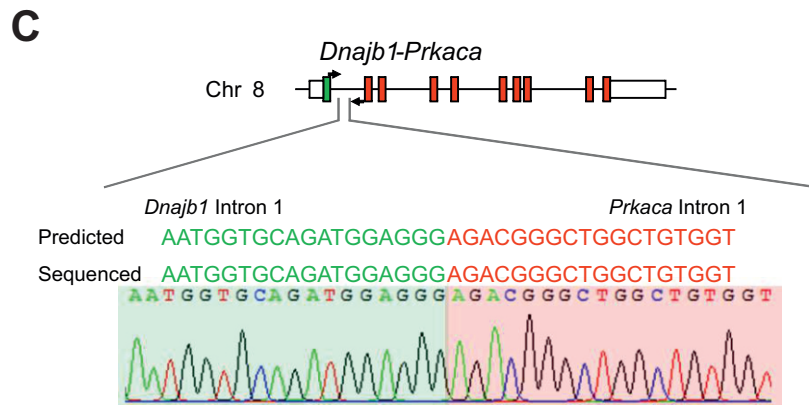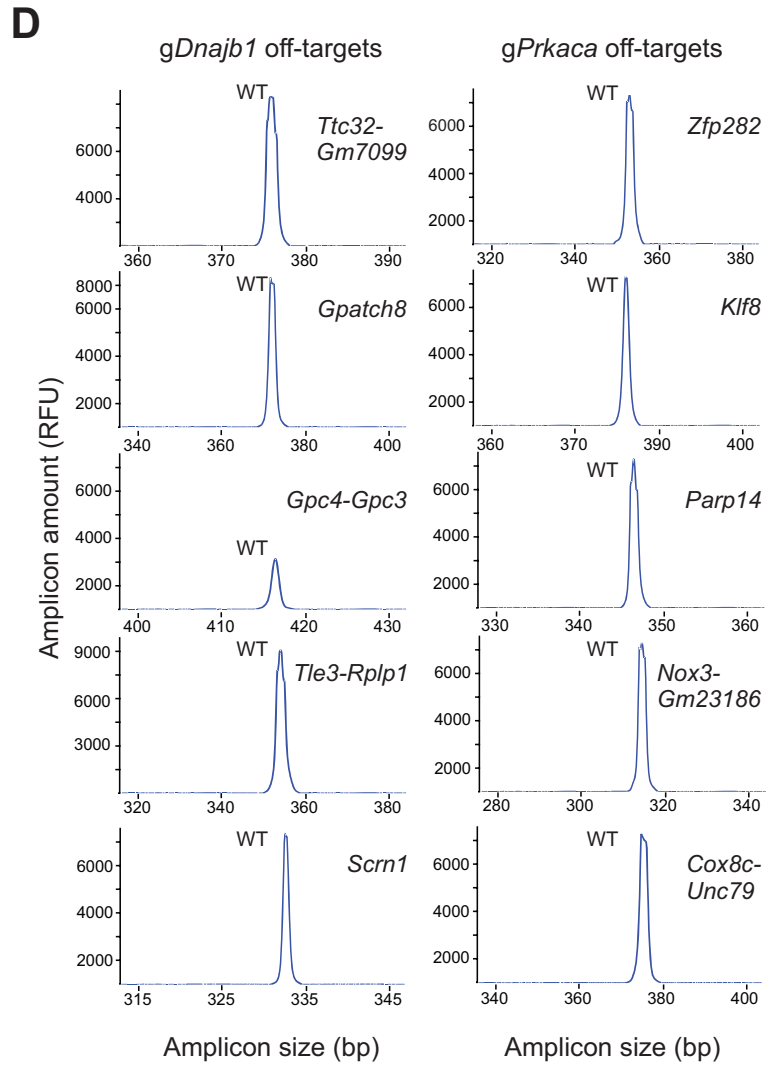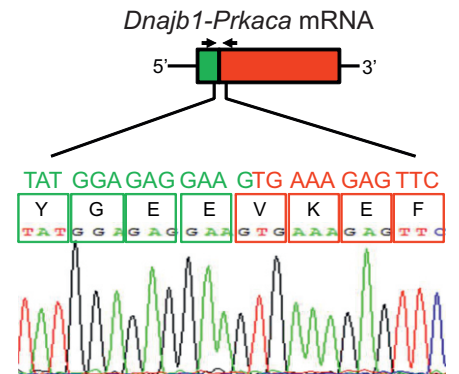

Supplement: NIHMS906621-supplement-3.pdf [file NIHMS906621-supplement-3.pdf]

# Supplementary Figure 3

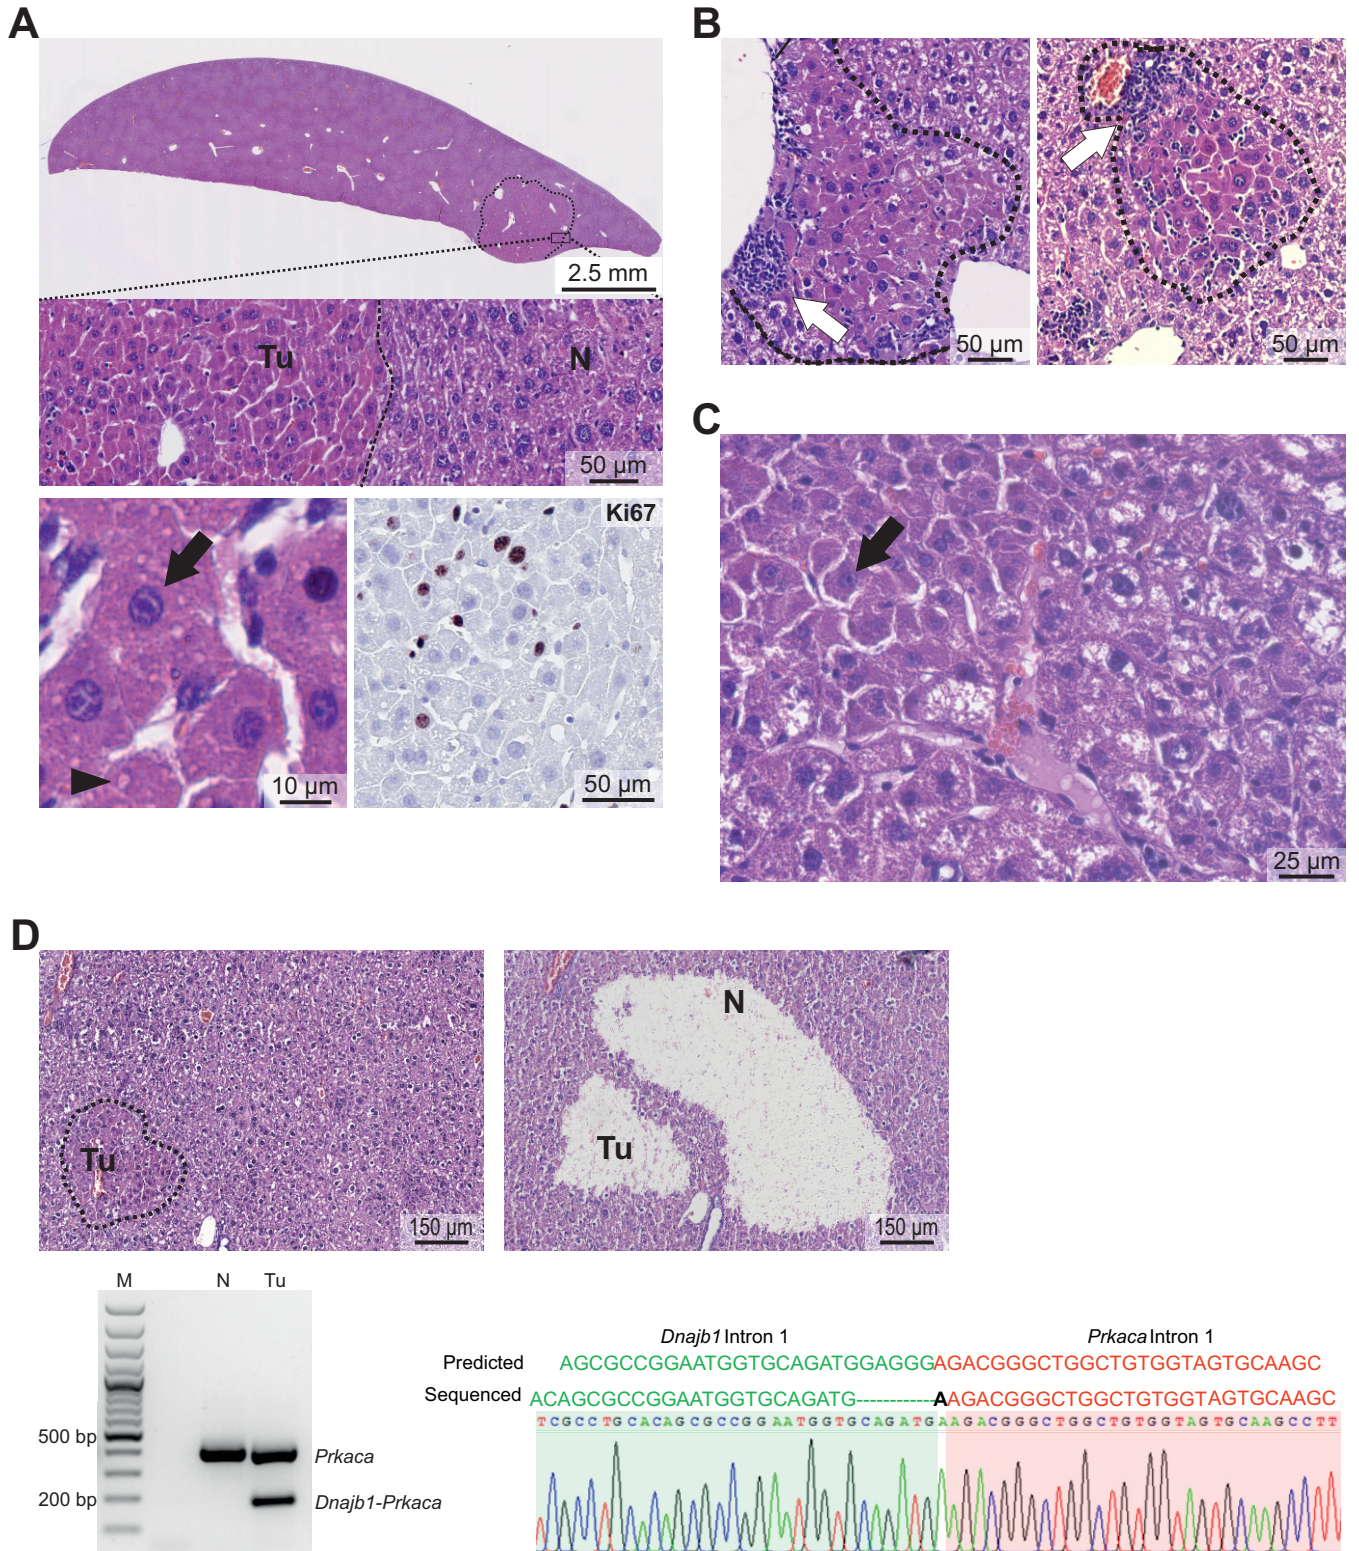

Supplement: NIHMS906621-supplement-4.pdf [file NIHMS906621-supplement-4.pdf]

# Supplementary Figure 4

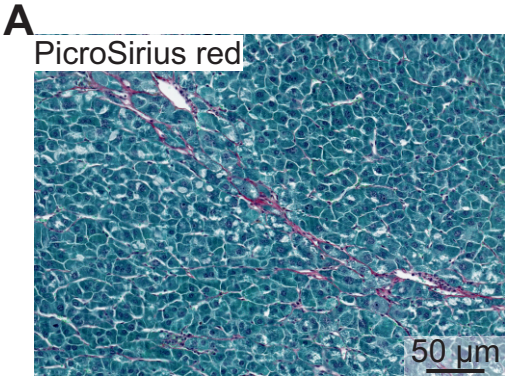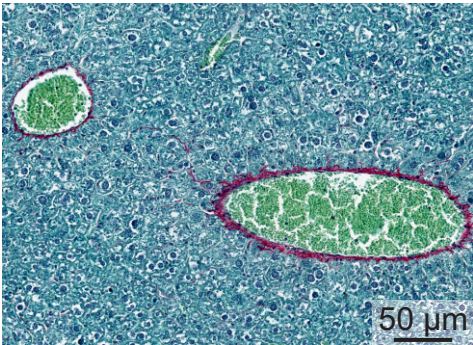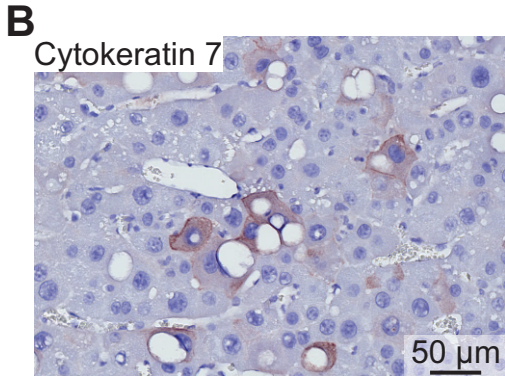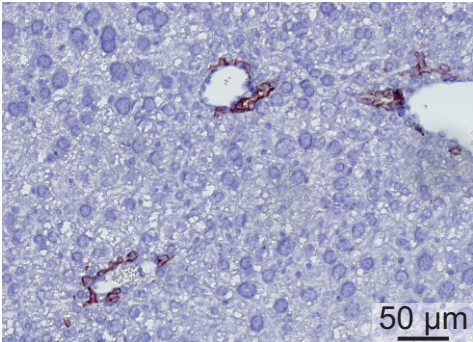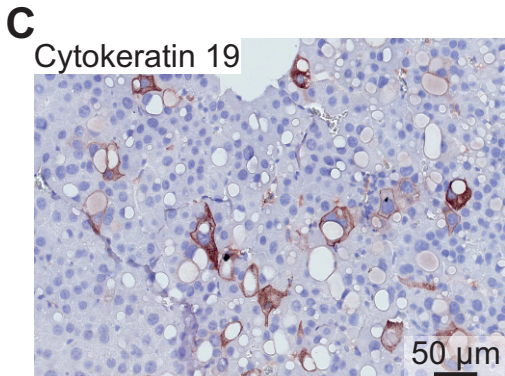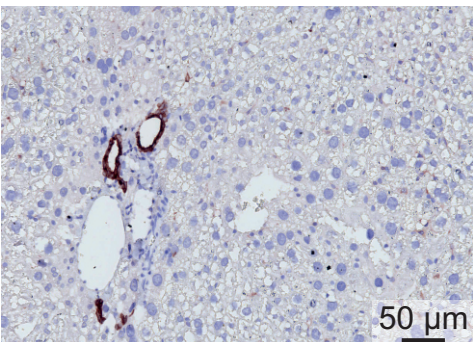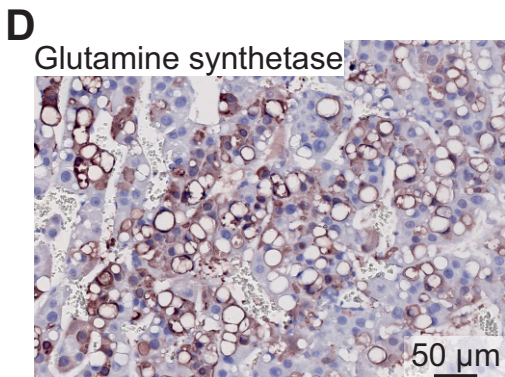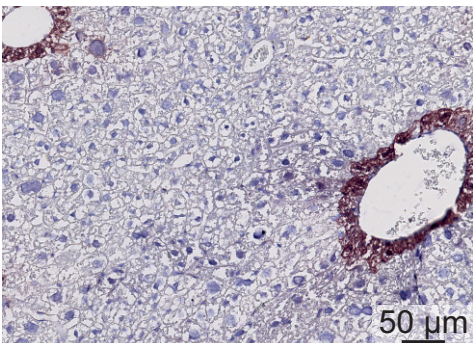

Supplement: NIHMS906621-supplement-5.pdf [file NIHMS906621-supplement-5.pdf]

# Supplementary Figure 5

**A**

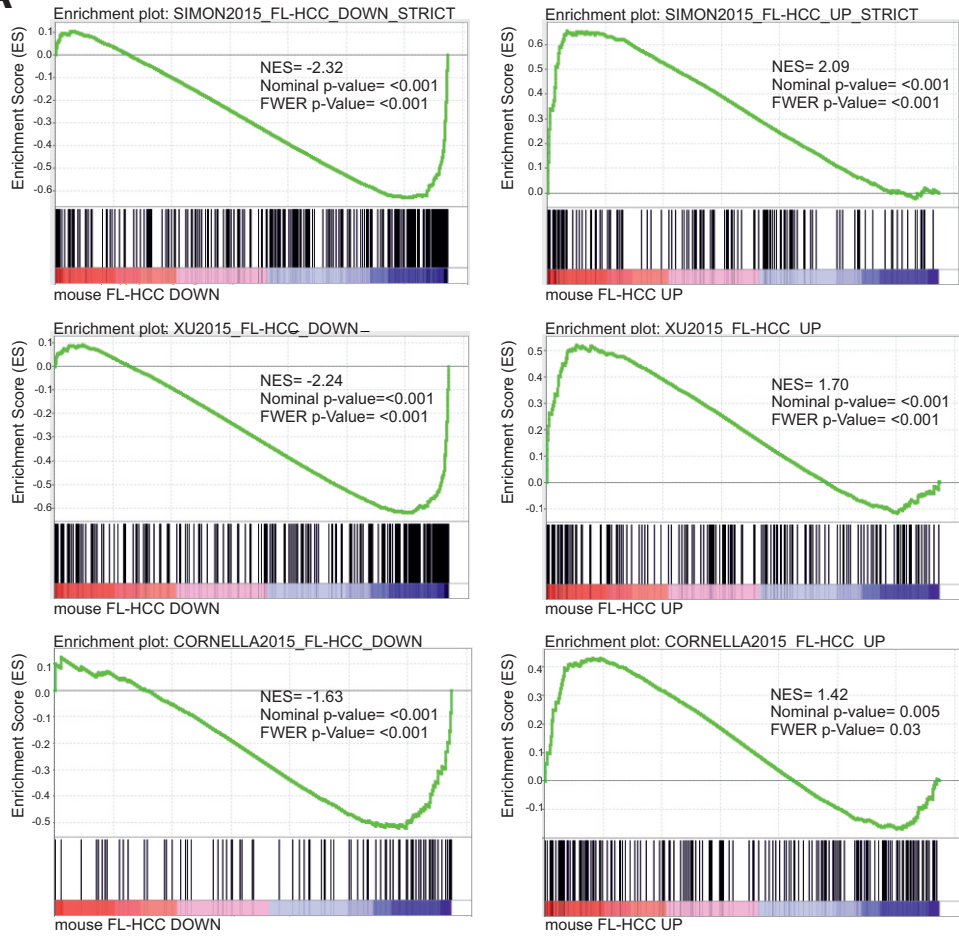

**B**

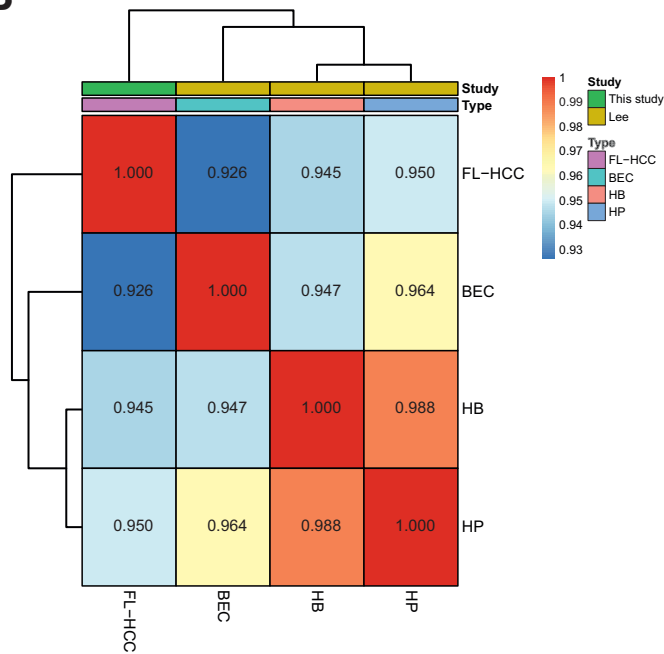

Supplement: NIHMS906621-supplement-6.pdf [file NIHMS906621-supplement-6.pdf]

# Supplementary Figure 6

A

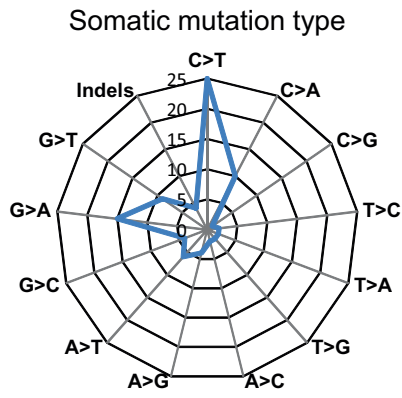

B

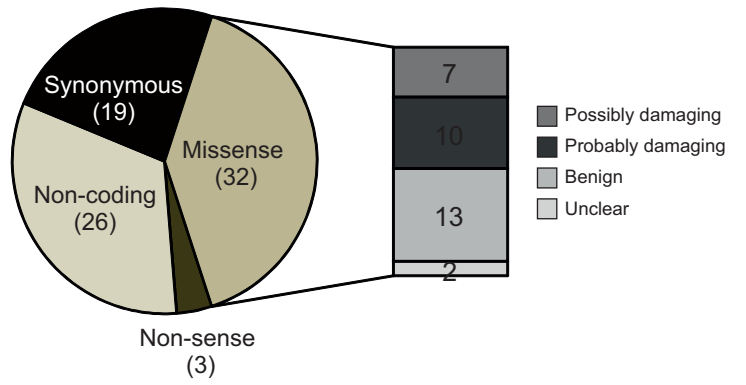

C

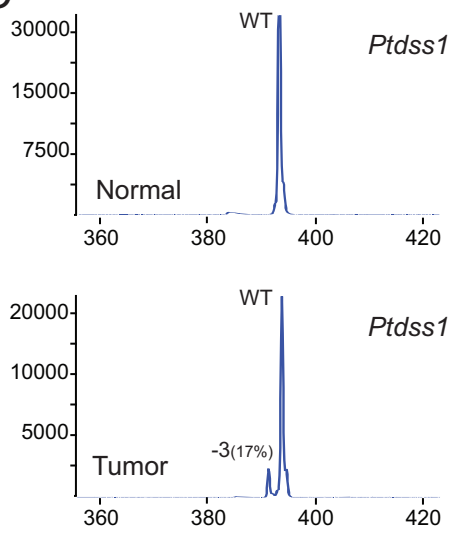

Supplement: NIHMS906621-supplement-7.pdf [file NIHMS906621-supplement-7.pdf]
